# Supplementary material for: Indoor Air Pollution and the Health of Vulnerable Groups: A Systematic Review Focused on Particulate Matter (PM), Volatile Organic Compounds (VOCs) and Their Effects on Children and People with Pre-Existing Lung Disease
Source: MDPI journal article supplement (doi:10.3390/ijerph19148752), 2022-07-19
Supplement: s1 [file s1]

## Supplementary Materials

**Table S1.** Quality Report (order in year of publication, TZM and EH).

|                                           | 1  | 2 | 3 | 4 | 5 | 6 | 7 | 8 | 9 | 10 | 11 | Overall             |
|-------------------------------------------|----|---|---|---|---|---|---|---|---|----|----|---------------------|
| Raaschou-Nielsen, O. [59], et al., (1997) | H  | H | H | L | H | H | H | H |   |    |    | H (Cross sectional) |
| Rojas-Bracho, L. [60], et al., (2000)     | NA | H | H | H | H | H | H | H | U | U  | H  | H                   |
| Adgate, J. L. [15], et al., (2004)        | L  | H | H | L | H | H | H | H | U | U  | H  | H                   |
| Adgate, J. L. [16], et al., (2004)        | L  | H | H | L | H | H | H | H | U | U  | H  | H                   |
| Shendell, D. G. [63], et al., (2004)      | L  | H | H | L | L | H | H | H | U | U  | H  | L                   |
| Rojas-Bracho, L. [61], et al., (2004)     | NA | H | H | H | H | H | H | H | U | U  | H  | H                   |
| Sexton, K. [64], et al., (2005)           | L  | H | H | H | H | H | H | H | U | U  | H  | H                   |
| Batterman, S. [17], et al (2005)          | NA | H | H | H | H | H | H | H | H | H  | H  | H                   |
| Jansen, K. L. [44], et al., (2005)        | NA | H | H | H | H | H | H | H | L | L  | H  | H                   |
| Weisel, C. P. [71], et al., (2005)        | L  | H | H | H | H | H | H | H | U | U  | H  | H                   |
| Zhu, Y. F. [76], et al., (2005)           | NA | H | H | H | H | H | H | H | U | U  | H  | H                   |
| Phillips, M. L. [56], et al., (2005)      | NA | H | H | H | H | H | H | H | U | U  | H  | H                   |
| Delfino, R. J. [32], et al., (2006)       | L  | H | H | H | H | H | H | H | U | U  | H  | H                   |
| Trenga, C. A. [68], et al., (2006)        | NA | H | H | H | H | H | H | H | U | U  | H  | H                   |
| Diapouli, E. [33], et al., (2007)         | H  | H | H | H | U | U | H | U |   |    |    | H (Cross sectional) |
| Cortez-Lugo, M. [25], et al., (2008)      | NA | H | H | H | H | H | H | H | H | H  | H  | H                   |
| Diapouli, E. [34], et al., (2008)         | H  | H | H | H | U | U | H | L |   |    |    | H (Cross sectional) |
| Gokhale, S. [37], et al., (2008)          | L  | H | H | L | L | H | H | H | H | NA | H  | L                   |
| Goyal, R. and M. Khare [38] (2009)        | NA | H | H | H | H | H | H | H | H | U  | H  | H                   |
| Sohn, H. and K. Lee [65] (2010)           | NA | H | H | H | H | H | H | H | H | NA | H  | H                   |
| Massolo, L. [50], et al., (2010)          | NA | H | H | U | U | H | H | H | U | U  | H  | L                   |
| Byun, H. [18], et al., (2010)             | L  | H | H | U | H | H | H | H | U | U  | H  | H                   |
| Guo, H. [39], et al., (2010)              | H  | H | H | H | L | L | H | H |   |    |    | H                   |
| Kearney, J. [47], et al., (2011)          | NA | H | H | H | H | H | H | H | H | H  | H  | H                   |
| Habil, M. and A. Treja [42] (2011)        | H  | H | H | H | H | U | L | H |   |    |    | H (Cross-sectional) |
| Broich, A. V. [19], et al., (2012)        | L  | H | H | L | U | H | H | H | H | H  | H  | H                   |
| Buonanno, G. [20], et al., (2012)         | L  | H | H | H | H | H | H | H | U | U  | H  | H                   |
| Buonanno, G. [21], et al., (2013)         | L  | H | H | H | H | H | H | H | U | U  | H  | H                   |
| Gao, Y. [40], et al., (2014)              | H  | H | H | H | H | H | H | H | H | H  |    | H (Case Control)    |
| Baumgartner, J. [22], et al., (2014)      | L  | H | H | H | H | H | H | H | H | H  | H  | H                   |
| Branco, P. [23], et al., (2014)           | H  | H | H | H | L | L | H | H |   |    |    | H (Cross sectional) |
| Mazaheri, M. [52], et al., (2014)         | H  | H | H | H | L | L | H | H |   |    |    | H (Cross sectional) |
| Beko, G. [24], et al., (2015)             | H  | H | H | H | H | H | H | H |   |    |    | H (Cross sectional) |
| Rufo, J. C. [62], et al., (2015)          | H  | H | H | H | H | H | H | H |   |    |    | H (Cross sectional) |
| Wangchuk, T. [73], et al., (2015)         | H  | H | H | H | H | H | H | H |   |    |    | H (Cross sectional) |
| Cortez-Lugo, M. [26], et al., (2015)      | NA | H | H | L | U | H | H | H | H | H  | H  | H                   |
| Cipolla, M. [27], et al., (2016)          | H  | H | H | U | U | H | H | H | L | L  | H  | L                   |
| Mainka, A. and B. Kozielska [51] (2016)   | H  | H | H | H | H | H | H | H | H | U  | H  | H                   |
| Kalimeri, K. K. [48], et al., (2016)      | H  | H | H | H | H | H | L | H | U | U  | H  | H                   |
| Cleary, E. [28], et al., (2017)           | H  | H | H | H | L | L | U | H |   |    |    | H (Cross sectional) |
| Paunescu, A. C. [57], et al., (2017)      | L  | H | H | H | H | H | H | H | U | U  | H  | H                   |
| de Kluizenaar, Y. [83], et al., (2017)    | NA | H | H | L | U | H | H | H | U | H  | H  | H                   |
| Hoang, T. [43], et al., (2017)            | H  | H | H | H | L | L | H | H |   |    |    | H (Cross sectional) |
| Jeong, H. and D. Park [45] (2017)         | L  | H | H | H | H | H | H | H | H | U  | H  | H                   |
| Zamora, M. L. [77], et al., (2018)        | L  | H | H | H | H | H | H | H | U | U  | H  | H                   |
| Zhang, L. J. [78], et al., (2018)         | NA | H | H | H | H | H | H | H | L | U  | H  | H                   |
| Jeong, H. and D. Park [46] (2018)         | NA | H | H | H | H | H | H | H | U | U  | H  | H                   |
| Cheung, P. K. [29], et al., (2019)        | NA | H | H | H | H | H | H | H | U | U  | H  | H                   |
| Mazaheri, M. [53], et al., (2019)         | NA | H | H | H | H | H | H | H | H | H  | H  | H                   |
| Slezakova, K. [67], et al., (2019)        | H  | H | H | H | H | H | H | H |   |    |    | H (Cross Sectional) |
| Yang, F. H. [75], et al., (2019)          | L  | H | H | L | L | H | H | H | H | H  | H  | H                   |

|                                           |          |          |          |          |          |          |          |          |          |           |           |           |           |                     |
|-------------------------------------------|----------|----------|----------|----------|----------|----------|----------|----------|----------|-----------|-----------|-----------|-----------|---------------------|
| Cunha-Lopes, I. [30], et al., (2019)      | NA       | H        | H        | L        | L        | H        | H        | H        | L        | L         | H         |           |           | L                   |
| Vu, D. C. [70], et al., (2019)            | H        | H        | H        | H        | H        | U        | H        | H        |          |           |           |           |           | H (Cross sectional) |
| Curto, A. [31], et al., (2019)            | L        | H        | H        | U        | U        | H        | H        | H        | H        | H         | H         |           |           | H                   |
| Garcia-Hernandez, C. [41], et al., (2019) | H        | H        | H        | H        | H        | U        | U        | H        | L        | H         | H         |           |           | H (Systemic Review) |
| Vardoulakis, S. [6], et al., (2020)       | H        | H        | H        | H        | H        | H        | H        | U        | U        | H         | H         |           |           | H (Systemic review) |
| Tran, T. D. [69], et al., (2020)          | H        | H        | H        | H        | L        | L        | H        | H        |          |           |           |           |           | H(Cross sectional)  |
| Liu, Y. W. [49], et al., (2020)           | NA       | H        | H        | L        | L        | H        | H        | H        | U        | L         | H         |           |           | L                   |
| Zhou, Y. F. [76], et al., (2020)          | L        | H        | H        | L        | L        | H        | H        | H        | U        | U         | H         |           |           | L                   |
| Zhou, H. C. [80], et al., (2020)          | NA       | H        | H        | H        | H        | H        | H        | H        | H        | H         | H         |           |           | H                   |
| Pacitto, A. [58], et al., (2020)          | NA       | H        | H        | U        | U        | H        | H        | H        | U        | U         | H         |           |           | L                   |
| Martins, V. [54], et al., (2020)          | H        | H        | H        | H        | L        | L        | H        | H        |          |           |           |           |           | H (Cross sectional) |
| Faria, T. [36], et al., (2020)            | H        | H        | H        | H        | L        | L        | H        | H        |          |           |           |           |           | H (Cross sectional) |
| Xia, X. [74], et al., (2020)              | H        | H        | H        | H        | H        | H        | H        | H        | H        | H         | H         |           |           | H                   |
| Zusman, M. [81], et al., (2020)           | H        | H        | H        | H        | H        | H        | H        | H        | H        | U         | H         |           |           | H                   |
| Martins, V. [55], et al., (2020)          | H        | H        | H        | H        | L        | L        | H        | H        |          |           |           |           |           | H (Cross sectional) |
| <b>RCT</b>                                | <b>1</b> | <b>2</b> | <b>3</b> | <b>4</b> | <b>5</b> | <b>6</b> | <b>7</b> | <b>8</b> | <b>9</b> | <b>10</b> | <b>11</b> | <b>12</b> | <b>13</b> | <b>Overall</b>      |
| Fang, L. [35], et al., (2019)             | H        | H        | H        | H        | H        | H        | H        | H        | H        | H         | H         | H         | H         | H                   |
| Soppa, V. J. [66], et al., (2014)         | H        | L        | H        | L        | L        | L        | H        | H        | H        | H         | H         | H         | H         | H                   |

Judgement (H—High, L—Low, U—Unclear, NA—not applicable).

**Table S2.** Joanna Briggs Institute Critical Appraisal Tools.

|   | <b>Cohort</b>                                                                | <b>Cross-Sectional</b>                                                   | <b>Case Control</b>                                                                  | <b>RCT</b>                                                                                                                        | <b>Systemic Review</b>                                              |
|---|------------------------------------------------------------------------------|--------------------------------------------------------------------------|--------------------------------------------------------------------------------------|-----------------------------------------------------------------------------------------------------------------------------------|---------------------------------------------------------------------|
| 1 | Were the two groups similar and recruited from the same population?          | Were the criteria for inclusion in the sample clearly defined?           | Were the groups comparable?                                                          | Was true randomization used for assignment of participants?                                                                       | Is the review question clearly and explicitly stated?               |
| 2 | Were the exposures measured similarly to both exposed and un-exposed groups? | Were the study subjects and the setting described in detail?             | Were cases and controls matched appropriately?                                       | Was allocation to treatment groups concealed?                                                                                     | Were the inclusion criteria appropriate for the review question?    |
| 3 | Was the exposure measured in a valid and reliable way?                       | Was the exposure measured in a valid and reliable way?                   | Were the same criteria used for identification of cases and controls?                | Were treatment groups similar at the baseline?                                                                                    | Was the search strategy appropriate?                                |
| 4 | Were confounding factors identified?                                         | Were objective, standard criteria used for measurement of the condition? | Was exposure measured in a standard, valid and reliable way?                         | Were participants blind to treatment assignment?                                                                                  | Were the sources and resources used to search for studies adequate? |
| 5 | Were strategies to deal with confounding factors stated?                     | Were confounding factors identified?                                     | Was exposure measured in the same way for cases and controls?                        | Were those delivering treatment blind to treatment assignment?                                                                    | Were the criteria for appraising studies appropriate?               |
| 6 | Were the participants free of the outcome at the start of the study?         | Were strategies to deal with confounding factors stated?                 | Were confounding factors identified?                                                 | Were outcomes assessors blind to treatment assignment?                                                                            | Was critical appraisal conducted by two or more reviewers?          |
| 7 | Were the outcomes measured in a valid and reliable way?                      | Were the outcomes measured in a valid and reliable way?                  | Were strategies to deal with confounding factors stated?                             | Were treatment groups treated identically?                                                                                        | Were there methods to minimize errors in data extraction?           |
| 8 | Was the follow up time reported and sufficient to be long enough?            | Was appropriate statistical analysis used?                               | Were outcomes assessed in a standard, valid and reliable way for cases and controls? | Was follow up complete and if not, were differences between groups in terms of their follow up adequately described and analyzed? | Were the methods used to combine studies appropriate?               |
| 9 | Was follow up complete, and if not, were the reasons to loss to              |                                                                          | Was the exposure period of interest long enough to be meaningful?                    | Were participants analyzed in the groups to which they were randomized?                                                           | Was the likelihood of publication bias assessed?                    |

|    |                                                           |                                            |                                                                                                                                           |                                                                   |
|----|-----------------------------------------------------------|--------------------------------------------|-------------------------------------------------------------------------------------------------------------------------------------------|-------------------------------------------------------------------|
|    | follow up described and explored?                         |                                            |                                                                                                                                           |                                                                   |
| 10 | Were strategies to address incomplete follow up utilized? | Was appropriate statistical analysis used? | Were outcomes measured in the same way for treatment groups?                                                                              | Were recommendations for practice supported by the reported data? |
| 11 | Was appropriate statistical analysis used?                |                                            | Were outcomes measured in a reliable way?                                                                                                 | Were the specific directives for new research appropriate?        |
| 12 |                                                           |                                            | Was appropriate statistical analysis used?                                                                                                |                                                                   |
| 13 |                                                           |                                            | Was the trial design appropriate, and any deviations from the standard RCT design accounted for in the conduct and analysis of the trial? |                                                                   |
